# Supplementary material for: Enantioselective adsorption of limonenes and α-pinenes on germanium oxide metal-organic framework
Source: Research Square preprint supplement (doi:10.21203/rs.3.rs-7470067/v1), 2025-09-22
Supplement: Supplementary file 1 [file d13fa1c86e05a215deddde5d.docx]

**Enantioselective adsorption of limonenes and α-pinenes on germanium oxide metal-organic framework**

Yulia F. Sharafutdinovaa, Klavdia M. Sufiyarovaa, Adelina S. Samarinaa, Diana O. Bagdanovab, Marat R. Agliullinb, Timur A. Mukhametzyanovc and Vladimir Yu. Guskova

1. Ufa University of Science and Technology, 32 Zaki Validi str., Ufa, Russia.
2. Institute of Petrochemistry and Catalysis RAS, 141 Oktyabrya av., Ufa, Russia
3. A.M. Butlerov Chemical Institute, Kazan Federal University, Kremlevskaya Str. 18, Kazan 420008, Russia


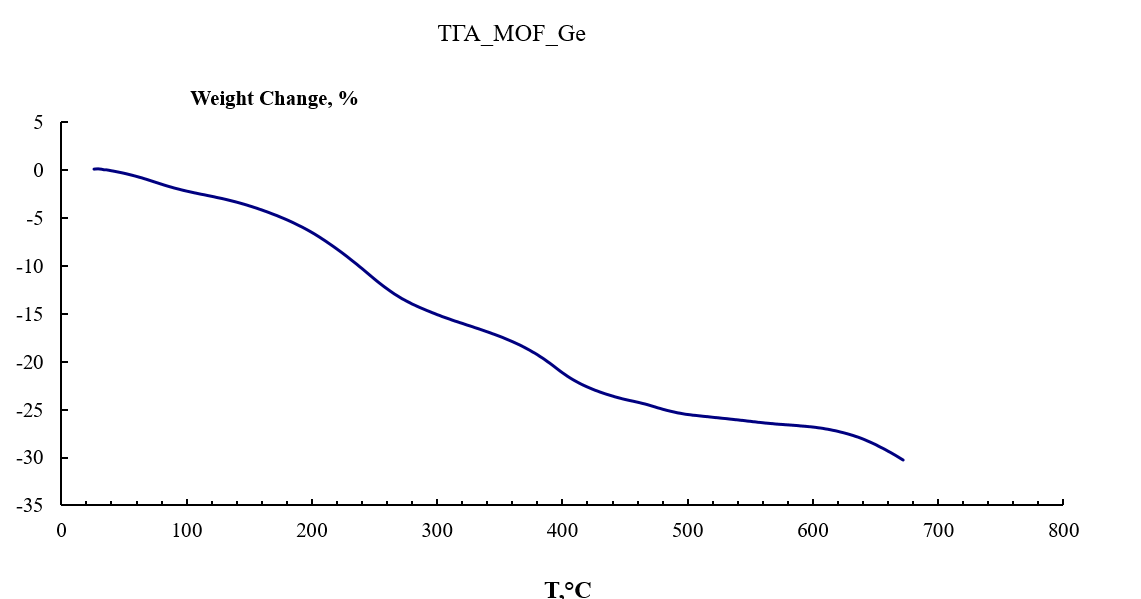


Figure 1S. MOF mass losses with temperature

Figure 2S. DSC curve

Figure 3S. Limonene enantiomers vapors adsorption isotherms at 130 °C

Table 1S. P-values for pairs of points of limonenes vapors adsorption at 130 °C (α = 0.05)

| P, Pa | р | P, Pa | р | P, Pa | р |
| --- | --- | --- | --- | --- | --- |
| 35 | 0.0006 | 261.6 | 0.0321 | 523.3 | 0.0061 |
| 558.3 | 0.011 | 784.9 | 0.0008 | 819.9 | 0.0009 |
| 854.9 | 0.0009 | 890.0 | 0.0008 | 925.0 | 0.0008 |

Figure 4S. Limonene enantiomers vapors adsorption isotherms at 140 °C

Table 2S. P-values for pairs of points of limonenes vapors adsorption at 140 °C (α = 0.05)

| P, Pa | р | P, Pa | р | P, Pa | р |
| --- | --- | --- | --- | --- | --- |
| 361.3 | 0.0336 | 409.6 | 0.8245 | 722.6 | 0.0048 |
| 770.9 | 0.016 | 819.3 | 0.0306 | 1132.2 | 0.0006 |
| 1180.6 | 0.0008 | 1228.9 | 0.0007 | 1277.3 | 0.0006 |

Figure 5S. Limonene enantiomers vapors adsorption isotherms at 150 °C

Table 3S. P-values for pairs of points of limonenes vapors adsorption at 150 °C (α = 0.05)

| P, Pa | р | P, Pa | р | P, Pa | р |
| --- | --- | --- | --- | --- | --- |
| 438.5 | 0.021 | 876.9 | 0.0022 | 944.8 | 0.0229 |
| 1315.4 | 0.0003 | 1384.2 | 0.0001 | 1686.0 | 0.00001 |
| 1753.9 | 0.00001 | 1821.7 | 0.00001 | 1889.6 | 0.00001 |

Figure 6S. α-pinene enantiomers vapors adsorption isotherms at 90 °C (first measurement)

Table 4S. P-values for pairs of points of α-pinenes vapors adsorption at 90 °C (α = 0.05, first measurement)

| P, Pa | р*105 | P, Pa | р*105 | P, Pa | р*105 |
| --- | --- | --- | --- | --- | --- |
| 33.1 | 0.2746 | 113 | 0.329 | 146.1 | 0.1632 |
| 179.2 | 0.0651 | 226.1 | 0.0529 | 245.4 | 0.0092 |
| 292.3 | 0.0041 | 325.4 | 0.0015 | 339.1 | 0.0015 |

Figure 7S. α-pinene enantiomers vapors adsorption isotherms at 90 °C (second and further measurements)

Table 5S. P-values for pairs of points of α-pinenes vapors adsorption at 90 °C (α = 0.05, second and further measurements)

| P, Pa | р*105 | P, Pa | р*105 | P, Pa | р*105 |
| --- | --- | --- | --- | --- | --- |
| 0.04 | 0.0016 | 0.16 | 0.0016 | 0.64 | 0.0168 |
| 0.68 | 0.0113 | 0.76 | 0.0061 | 0.80 | 0.0046 |
| 0.96 | 0.0016 | 0.99 | 0.0013 | 1.03 | 0.0011 |

Figure 8S. α-pinene enantiomers vapors adsorption isotherms at 100 °C

Table 6S. P-values for pairs of points of α-pinenes vapors adsorption at 100 °C (α = 0.05)

| P, Pa | р*105 | P, Pa | р*105 | P, Pa | р*105 |
| --- | --- | --- | --- | --- | --- |
| 40.9 | 0.0295 | 98.8 | 0.2768 | 156.6 | 0.1038 |
| 197.5 | 0.0105 | 255.3 | 0.0041 | 296.3 | 0.002 |
| 337.2 | 0.0003 | 354.1 | 0.0005 | 395.0 | 0.0002 |

Figure 9S. α-pinene enantiomers vapors adsorption isotherms at 120 °C

Table 6S. P-values for pairs of points of α-pinenes vapors adsorption at 120 °C (α = 0.05)

| P, Pa | р*105 | P, Pa | р*105 | P, Pa | р*105 |
| --- | --- | --- | --- | --- | --- |
| 13.7 | 0.0011 | 102 | 0.0006 | 142.9 | 0.001 |
| 170.2 | 0.0014 | 258.6 | 0.0002 | 285.8 | 0.0001 |
| 299.5 | 0.0001 | 374.2 | 0.00004 | 387.8 | 0.00001 |

Figure 10S. α-pinene enantiomers vapors adsorption isotherms at 130 °C

Table 6S. P-values for pairs of points of α-pinenes vapors adsorption at 130 °C (α = 0.05)

| P, Pa | р*105 | P, Pa | р*105 | P, Pa | р*105 |
| --- | --- | --- | --- | --- | --- |
| 18.5 | 0.0329 | 96.7 | 0.0455 | 115.2 | 0.1429 |
| 133.6 | 0.2777 | 152.1 | 0.3806 | 239.5 | 0.1548 |
| 248.8 | 0.2044 | 258 | 0.2291 | 267.2 | 0.2956 |
